# Supplementary material for: l-2-Hydroxyglutarate remodeling of the epigenome and epitranscriptome creates a metabolic vulnerability in kidney cancer models
Source: PubMed Central journal article supplement (PMC11213505; doi:10.1172/jci171294), 2024-05-14

Full unedited gel for Figure 1E

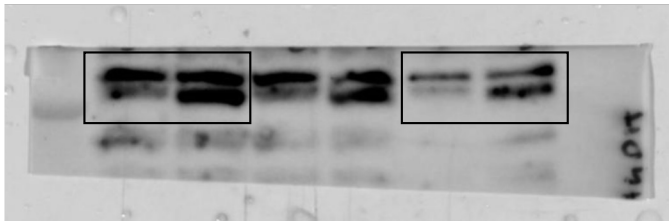

PHGDH

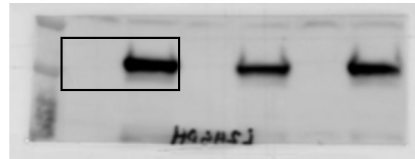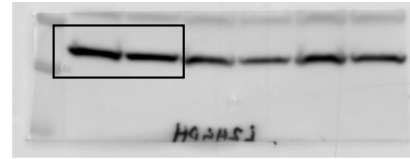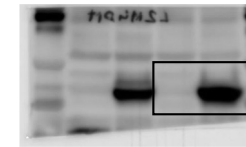

L2HGDH

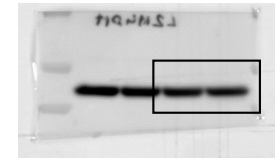

Actin

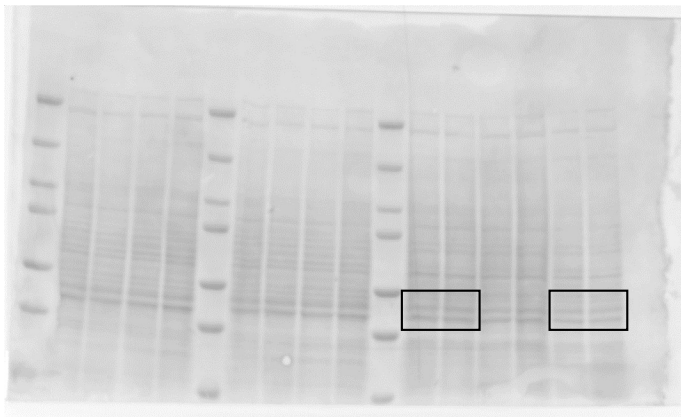

Ponceau

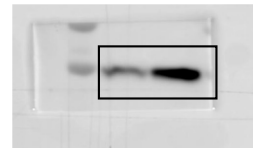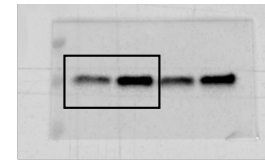

PSAT1

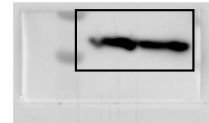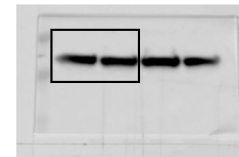

Actin

Full unedited gel for Figure 1F

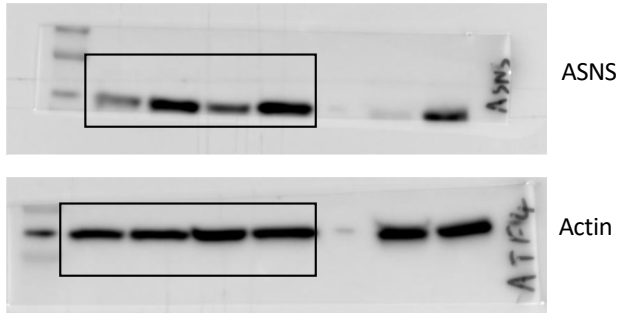

Full unedited gel for Figure 1G

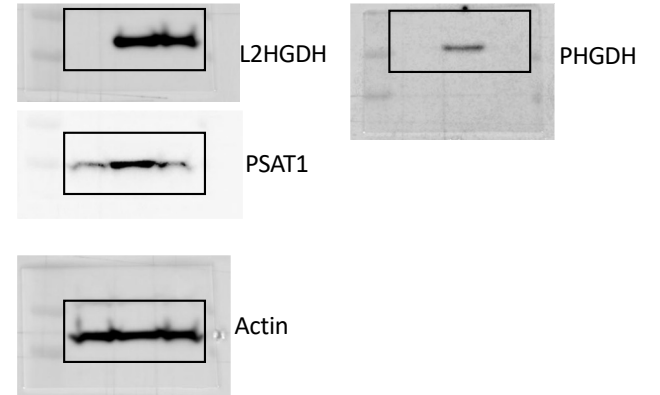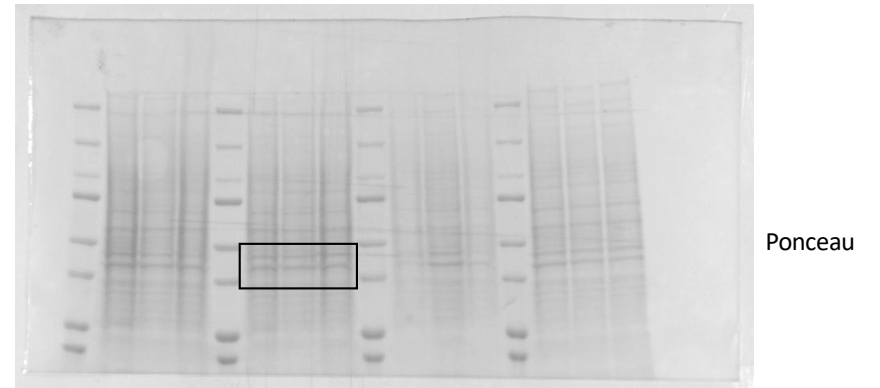



Full unedited gel for Figure 1H

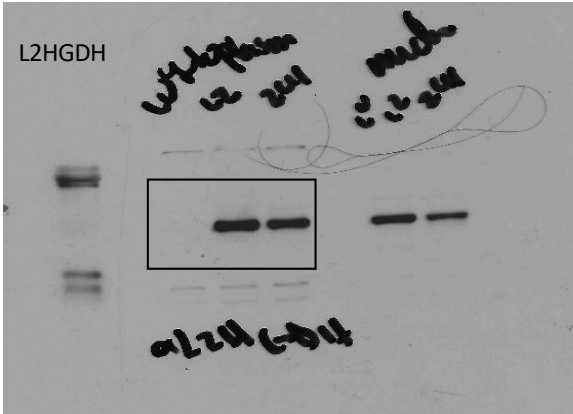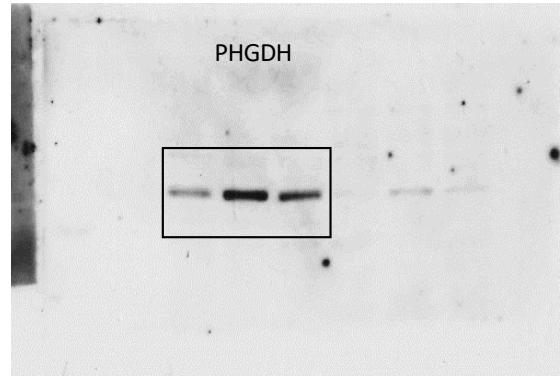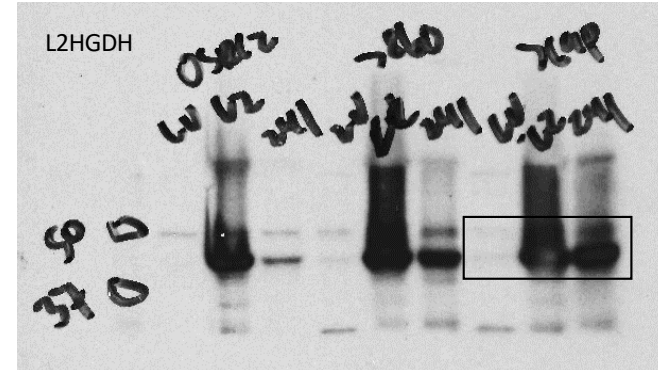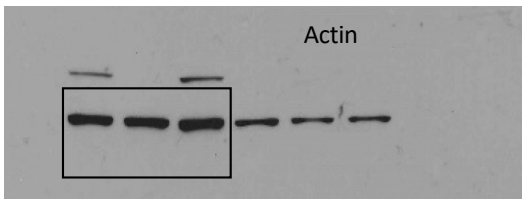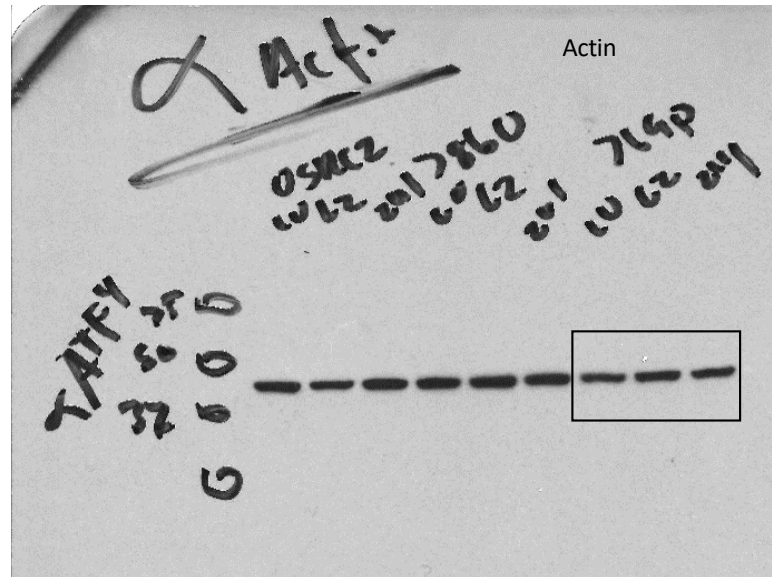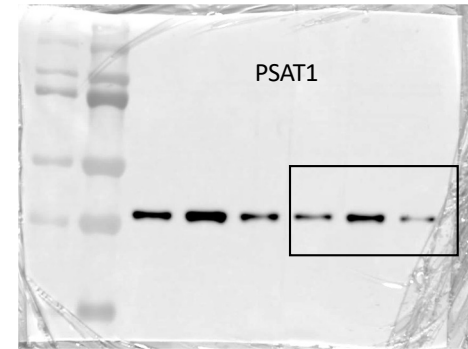

Full unedited gel for Figure 1K

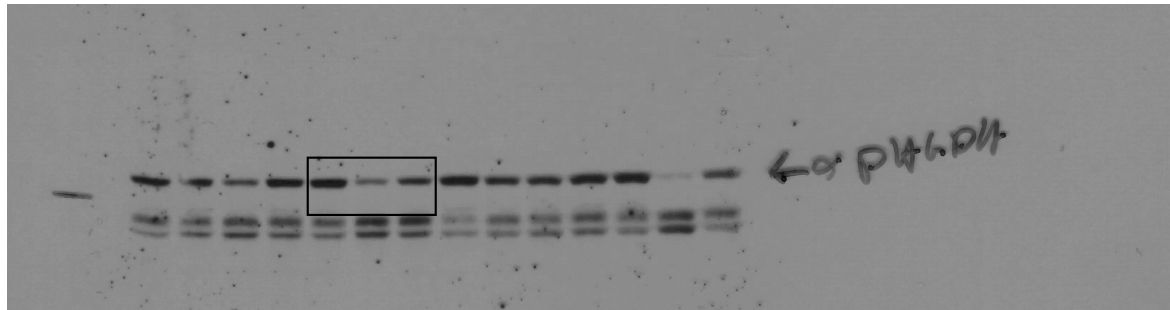

PHGDH

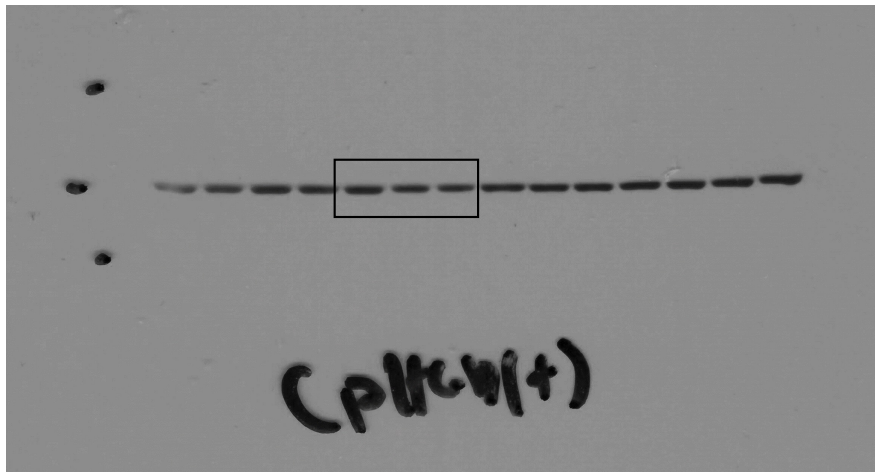

Actin

Full unedited gel for Figure 2A

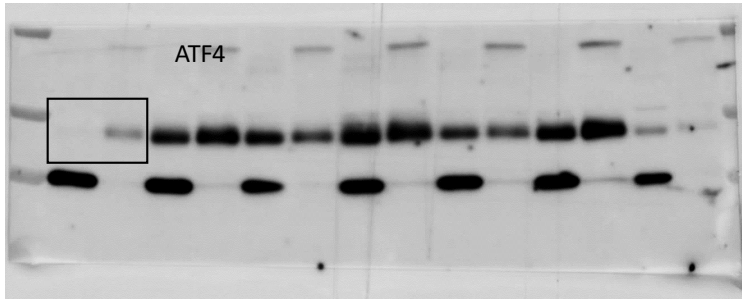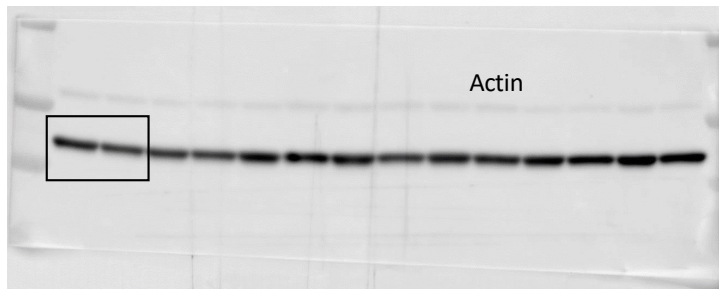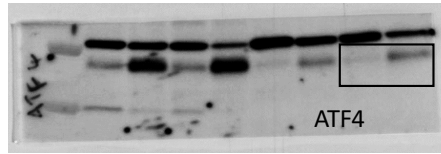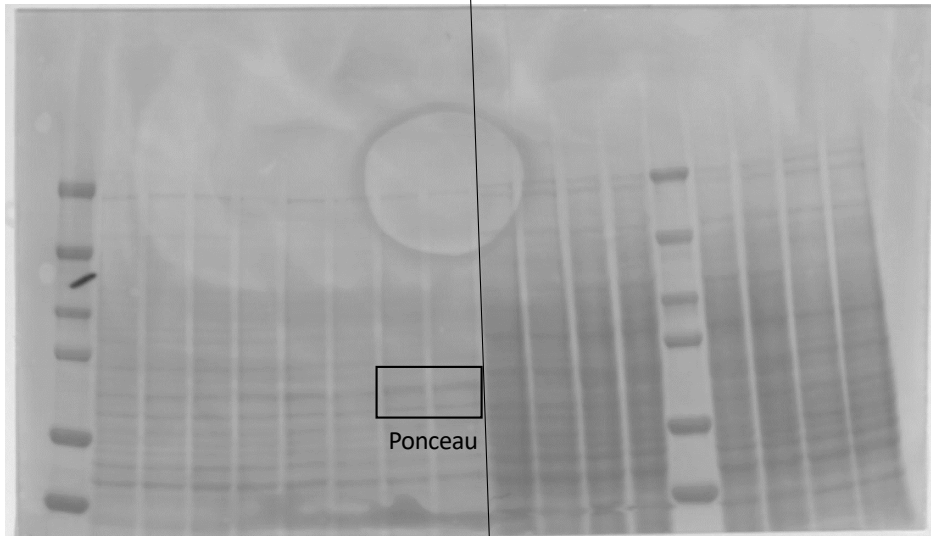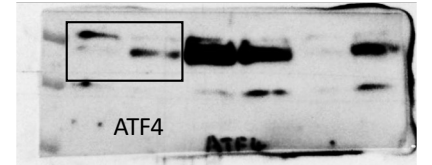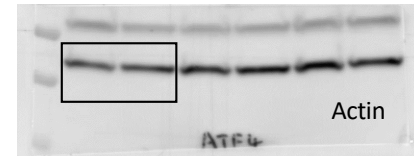

Full unedited gel for Figure 2B

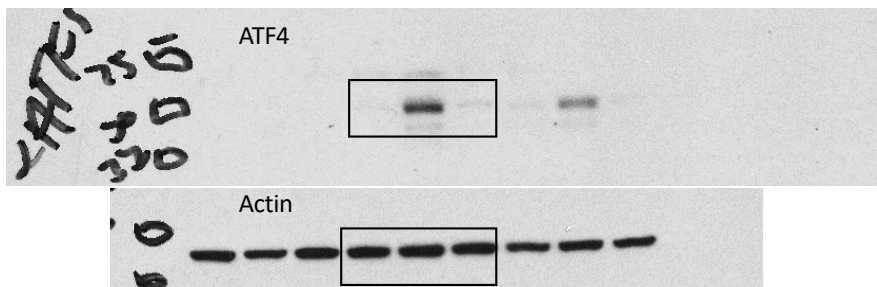

Full unedited gel for Figure 2C

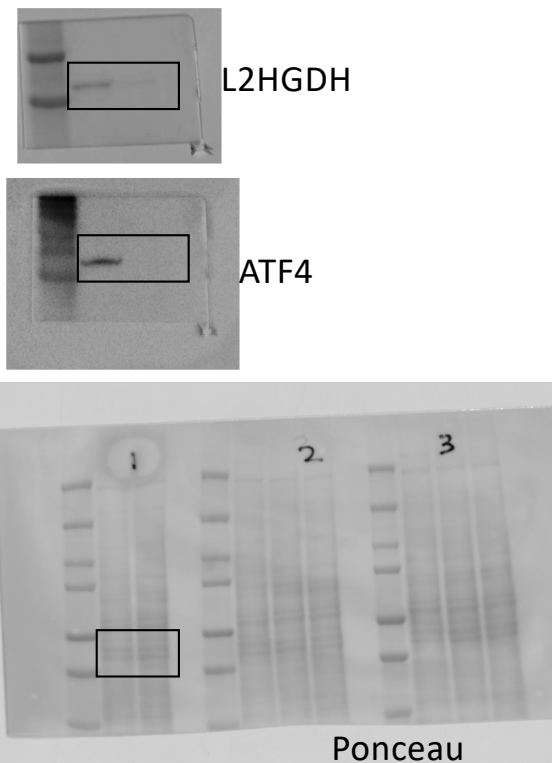

Full unedited gel for Figure 2D

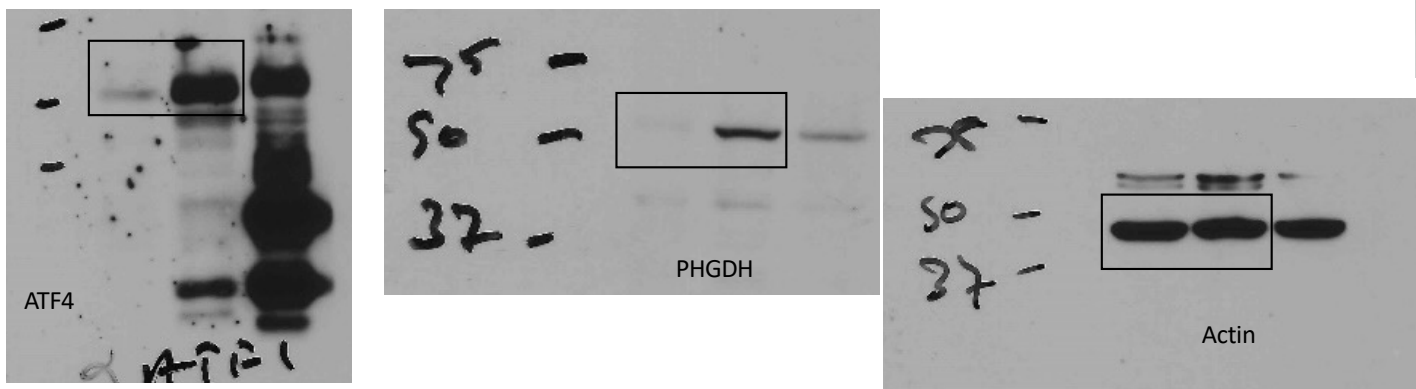

Full unedited gel for Figure 2F

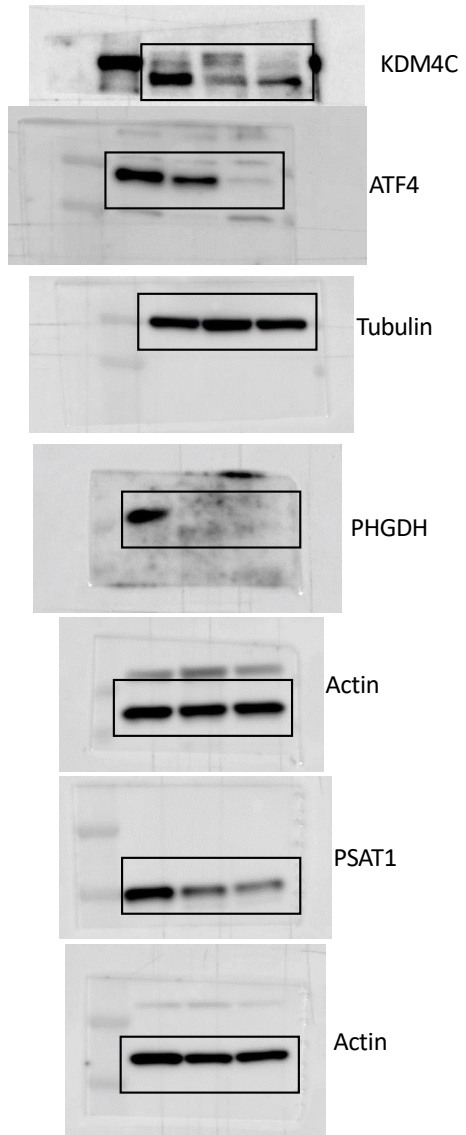

Full unedited gel for Figure 2G

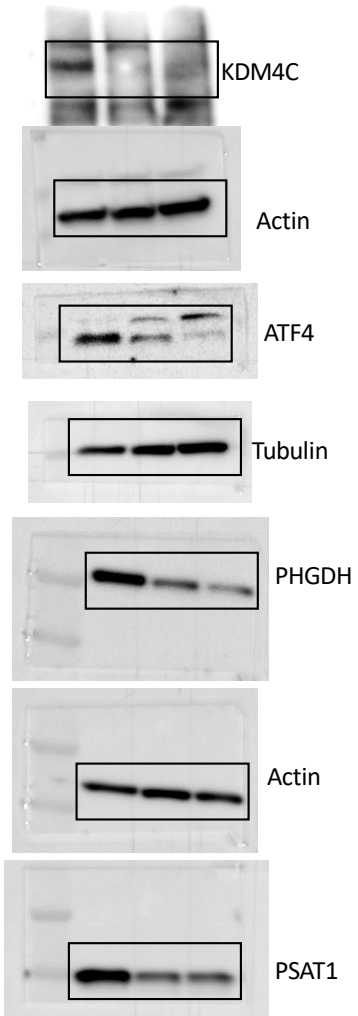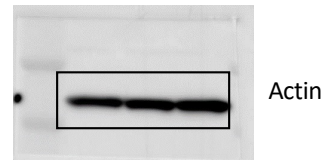

Full unedited gel for Figure 3A

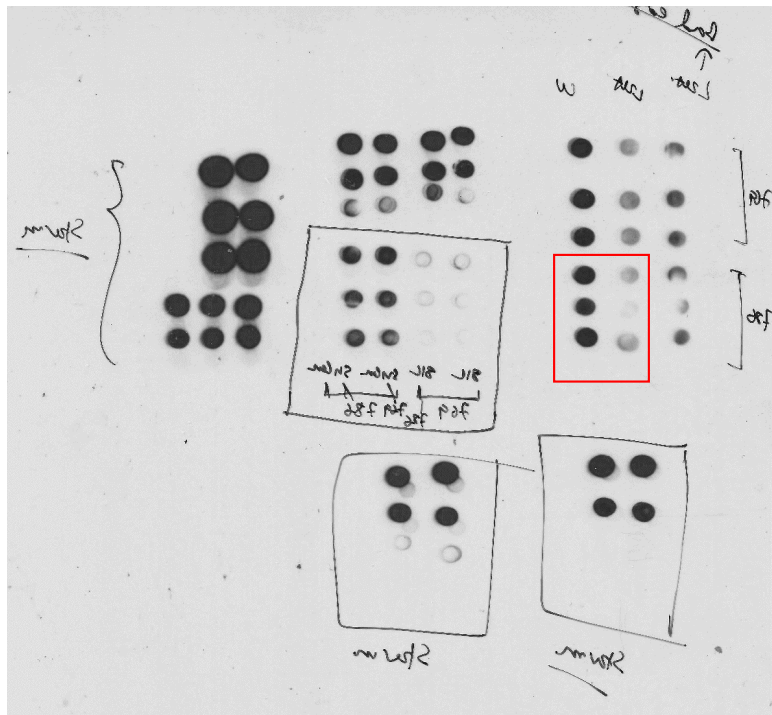

m6A

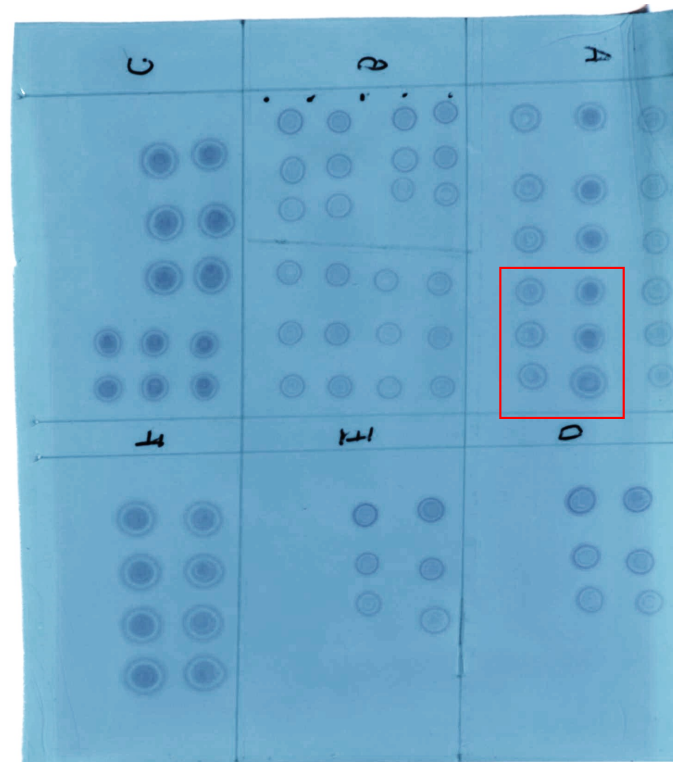

Methylene Blue



Full unedited gel for Figure 3B

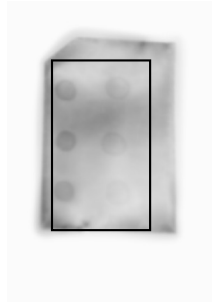

m6A

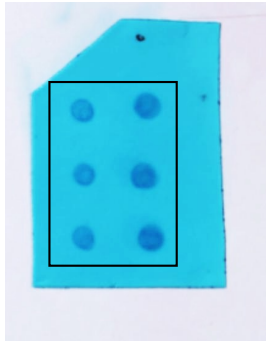

Methylene Blue

Full unedited gel for Figure 3E

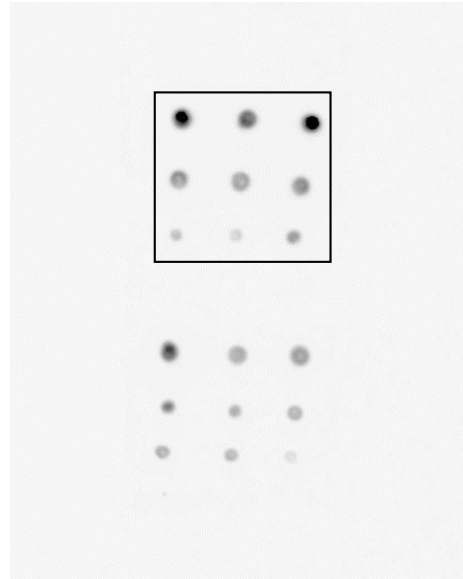

m6A

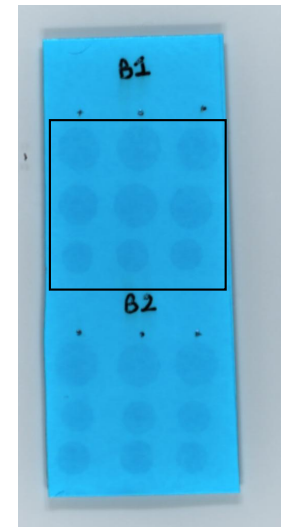

Methylene Blue



Full unedited gel for Figure 3G

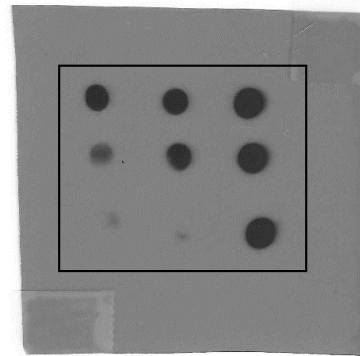

m6A

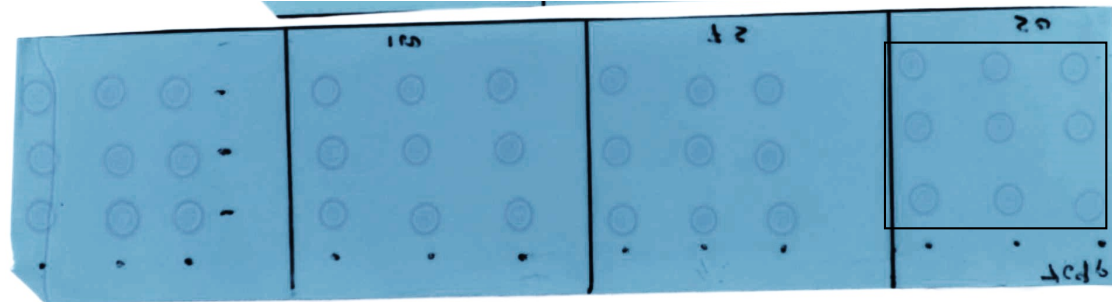

Methylene Blue

Full unedited gel for Figure 4A

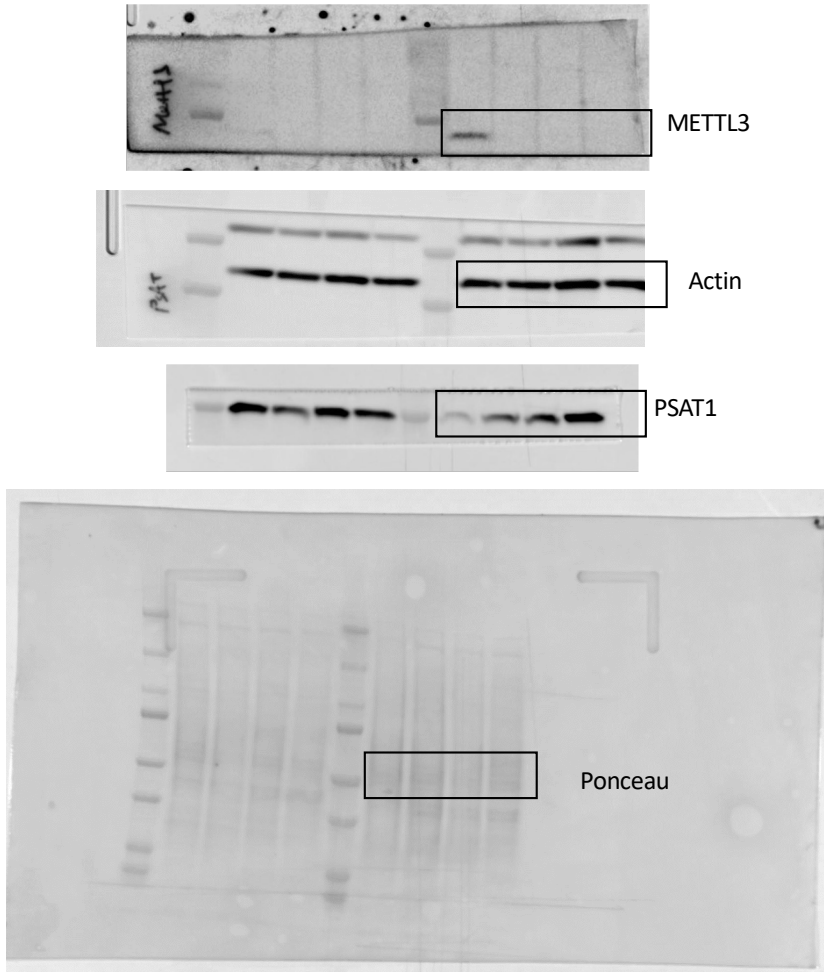

Full unedited gel Figure 4B

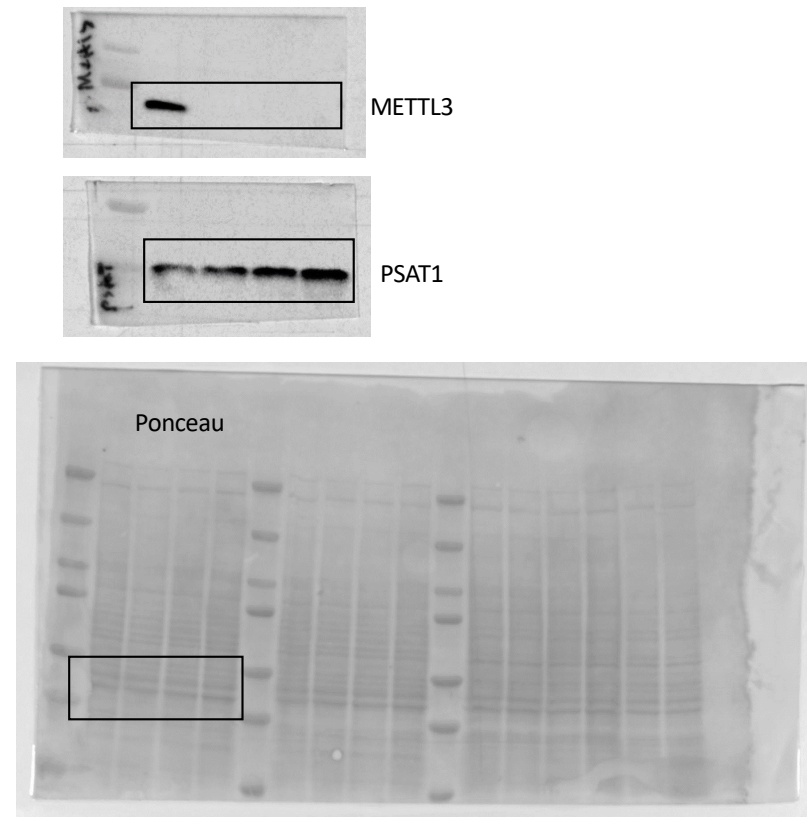

Full unedited gel for Figure 4D

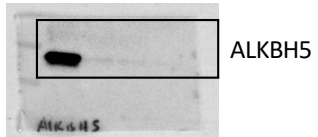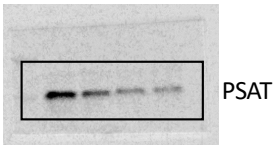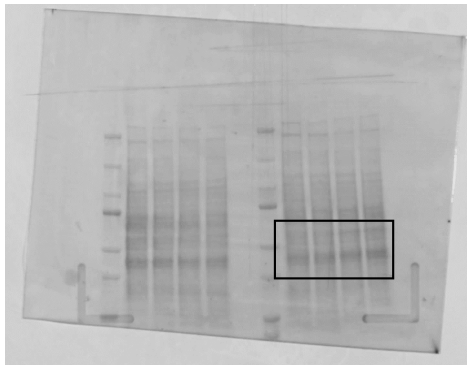

Ponceau

Full unedited gel for Figure 4E

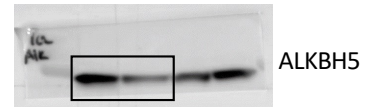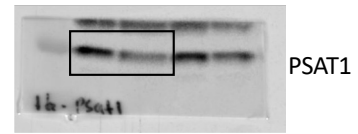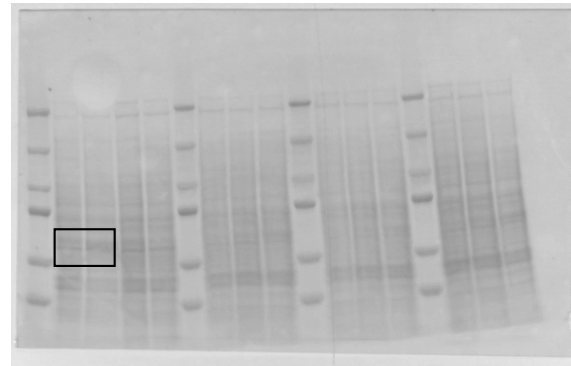

Ponceau

Full unedited gel for Figure 4F

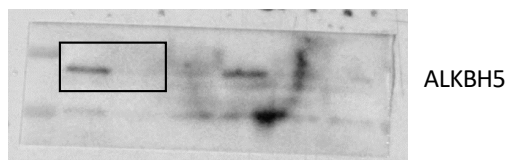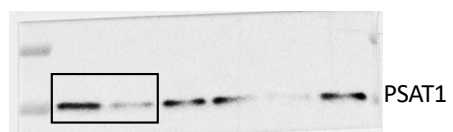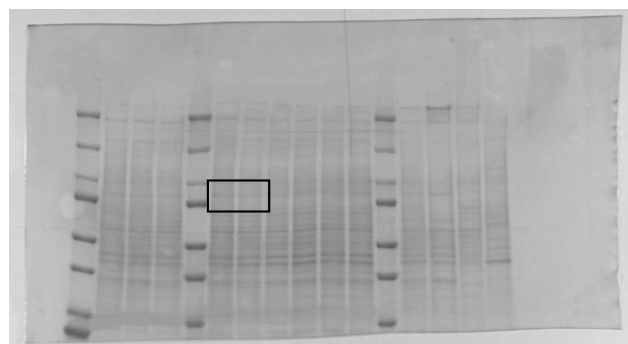

Ponceau

Full unedited gel for Figure 4G

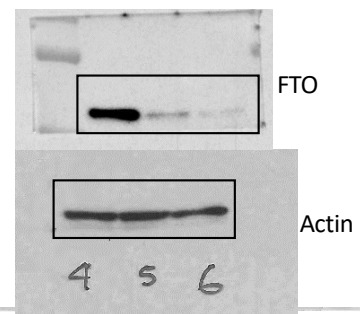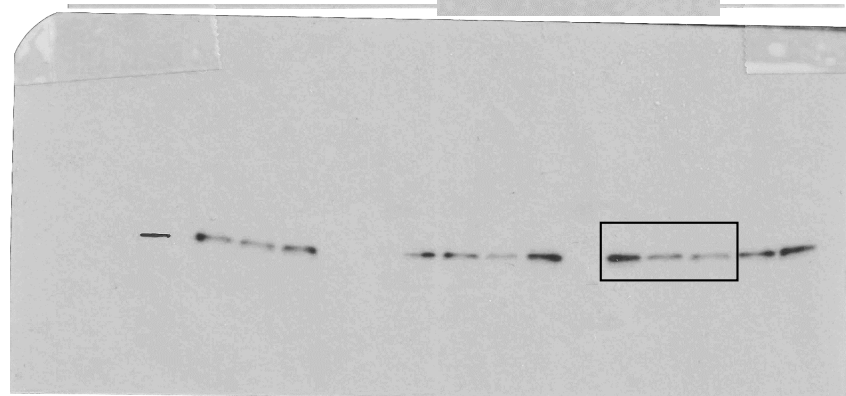

PSAT1

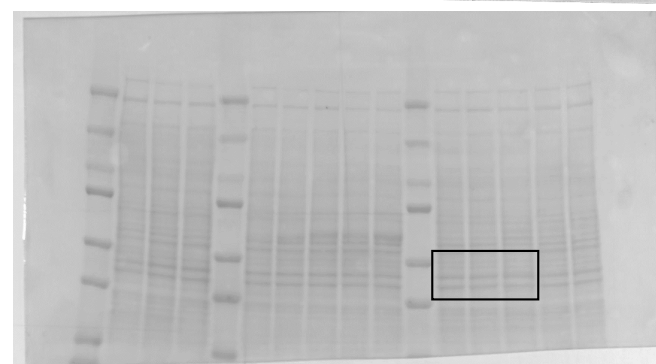

Ponceau

Full unedited gel for Figure 4K

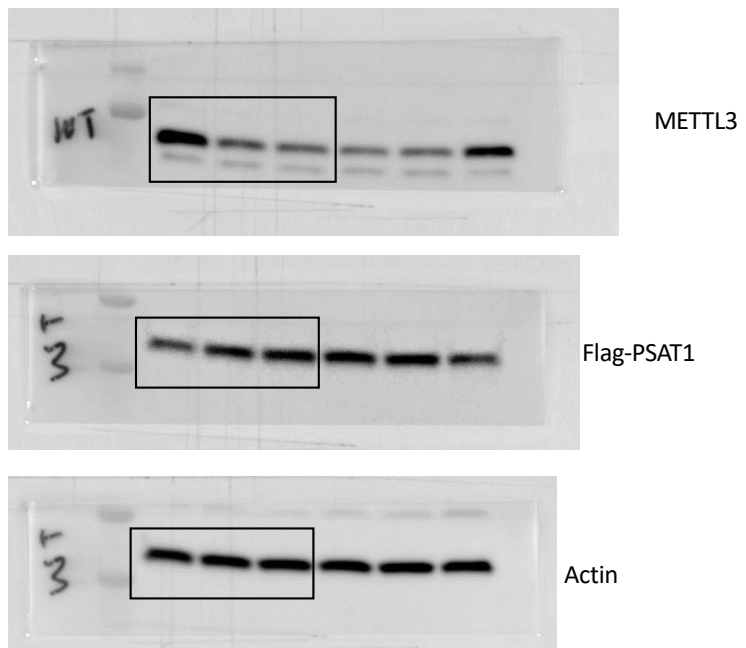

Full unedited gel for Figure 4M

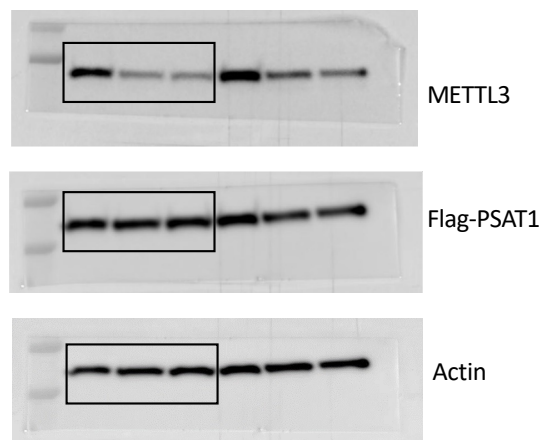

Full unedited gel for Figure 5E

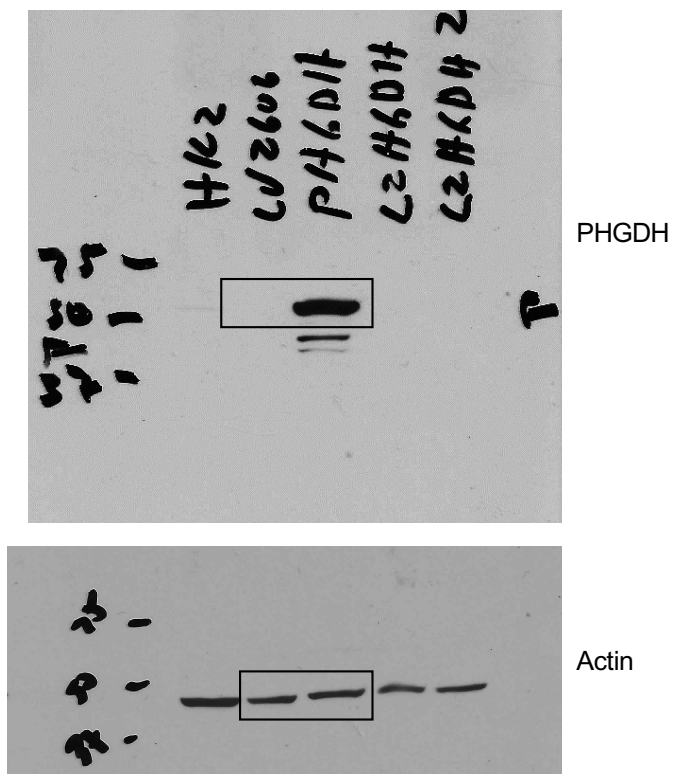

Full unedited gel for Figure 5H

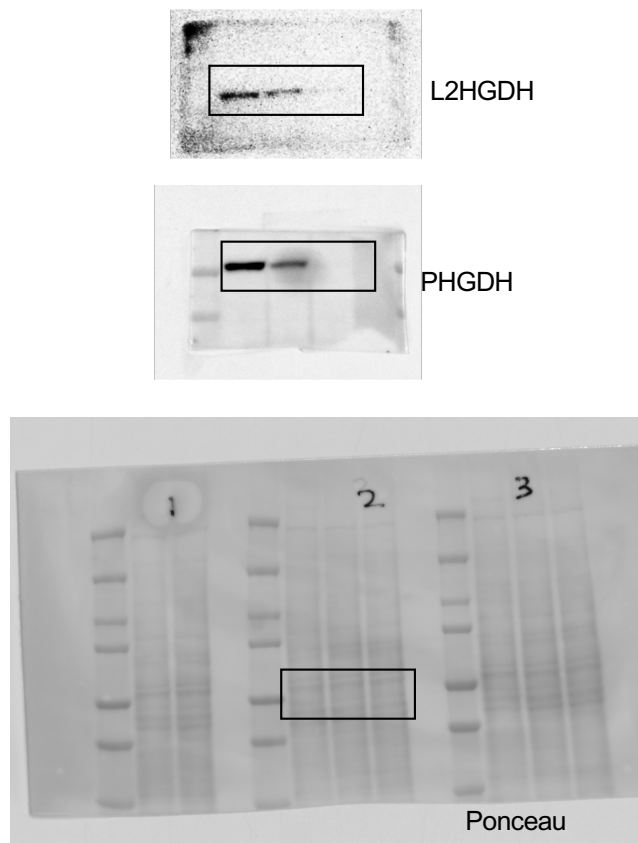

Full unedited gel for Figure 7D

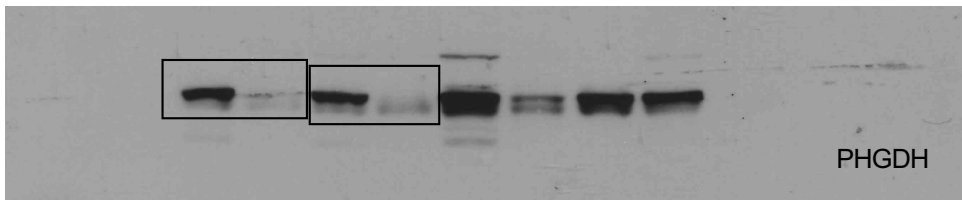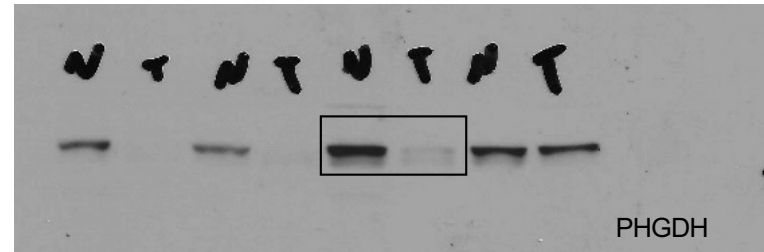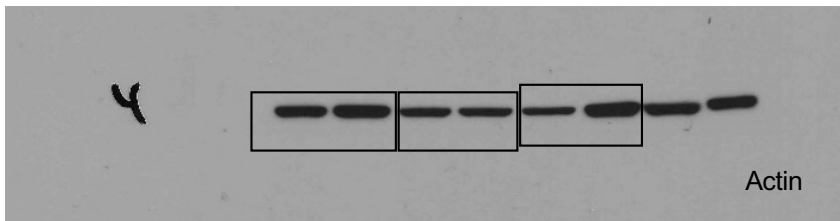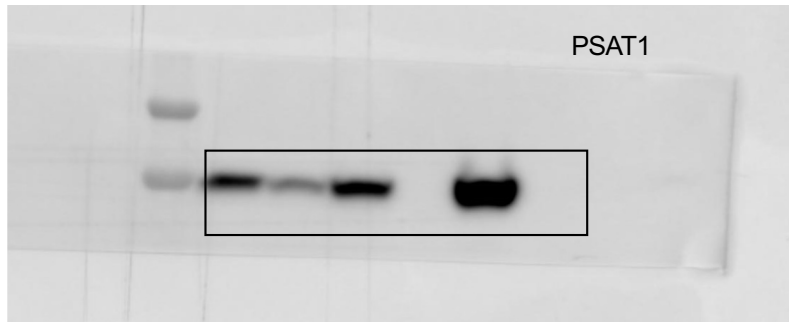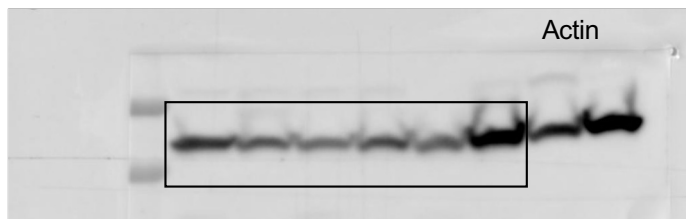

Full unedited gel for Figure 7F

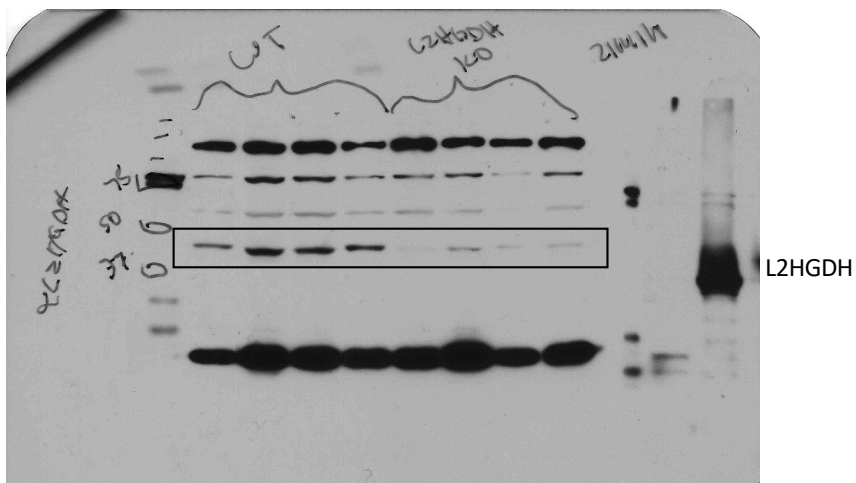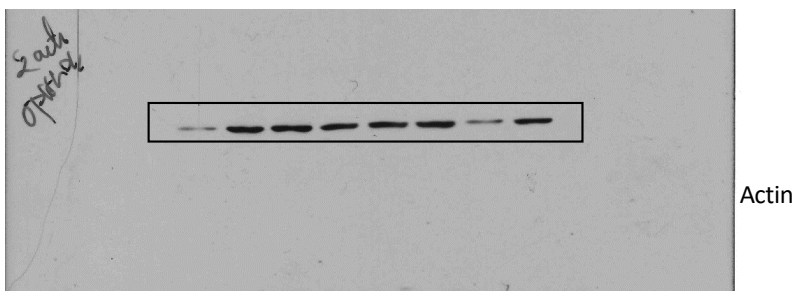

Full unedited gel for Figure 7H

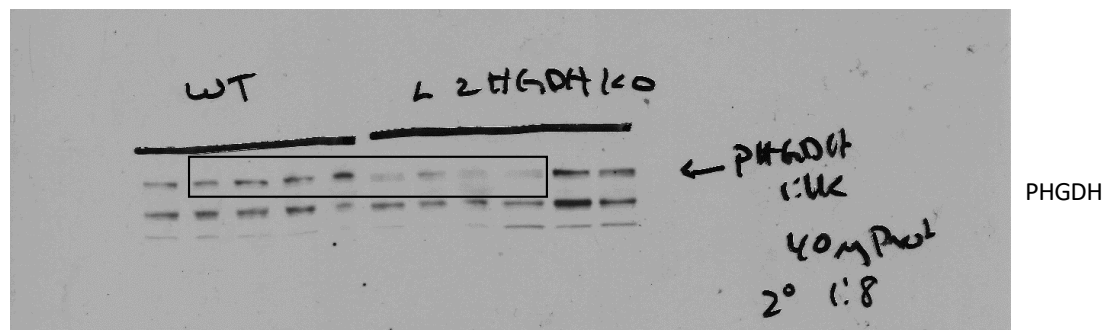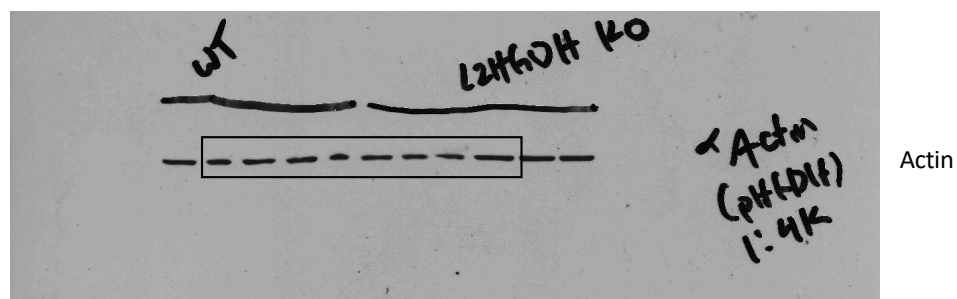



Full unedited gel for Figure S1D

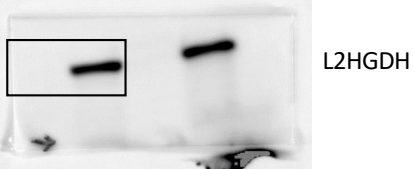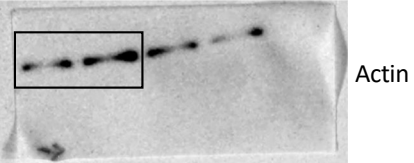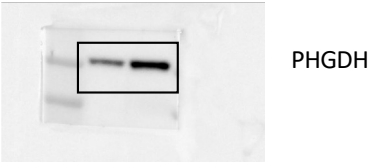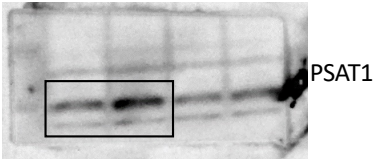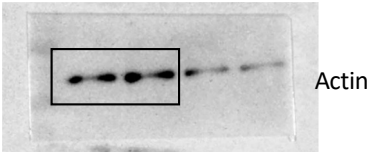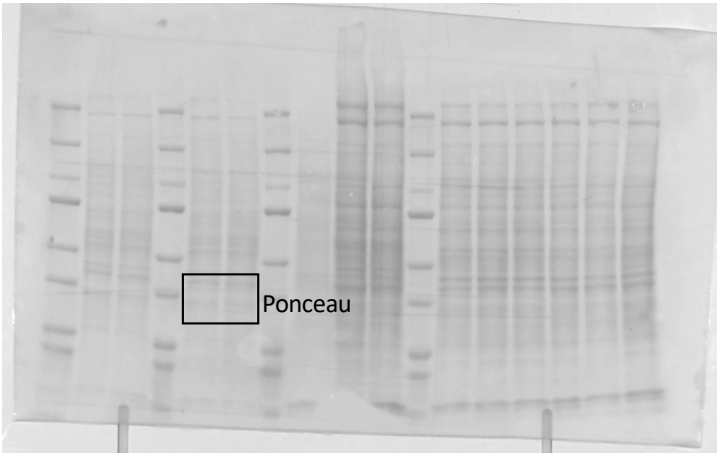

Full unedited gel for Figure S2A

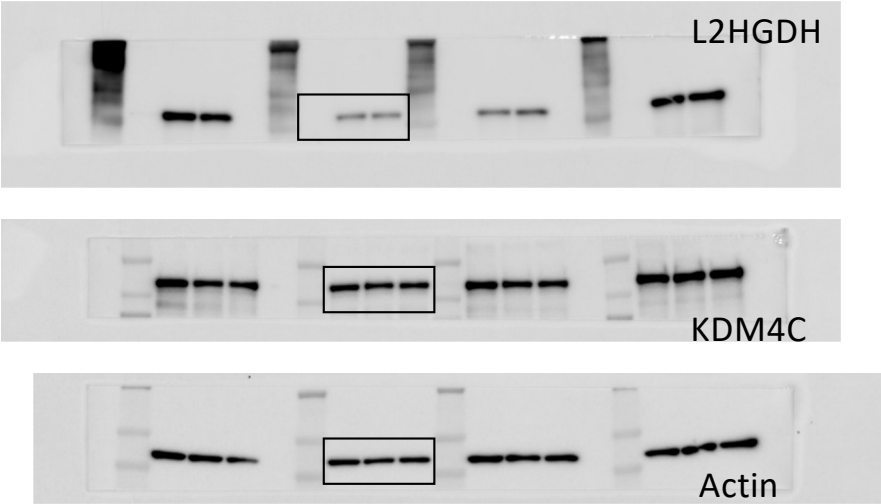

Full unedited gel for Figure S2B

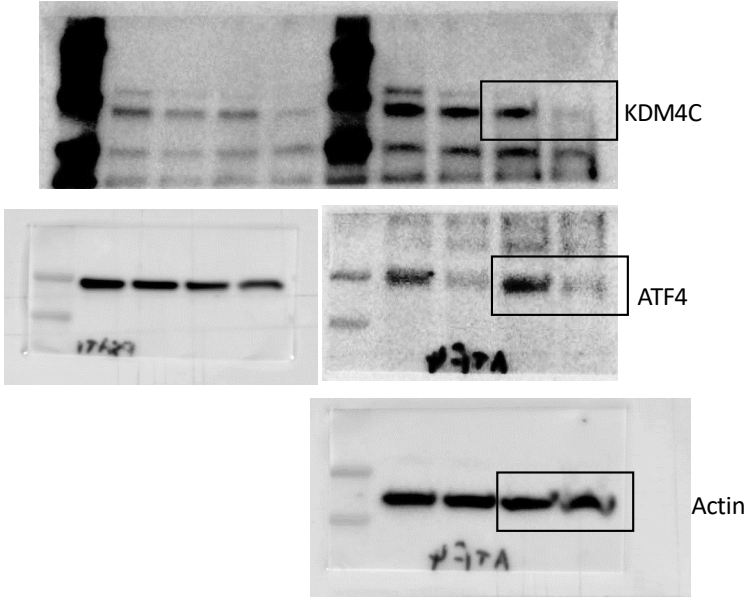

Full unedited gel for Figure S4

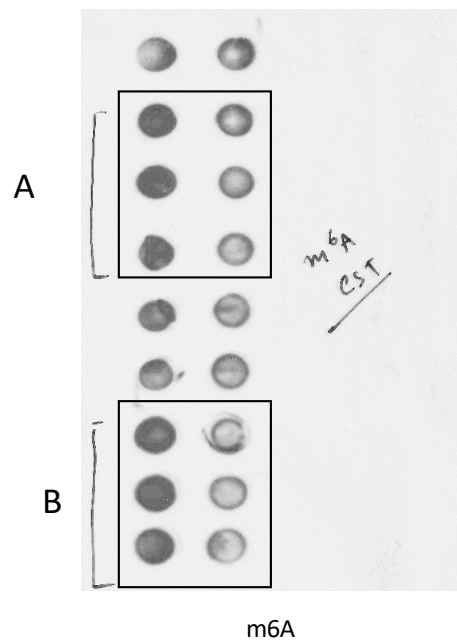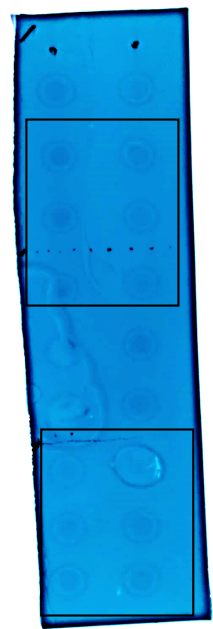

Uncropped gel for Figure S4E

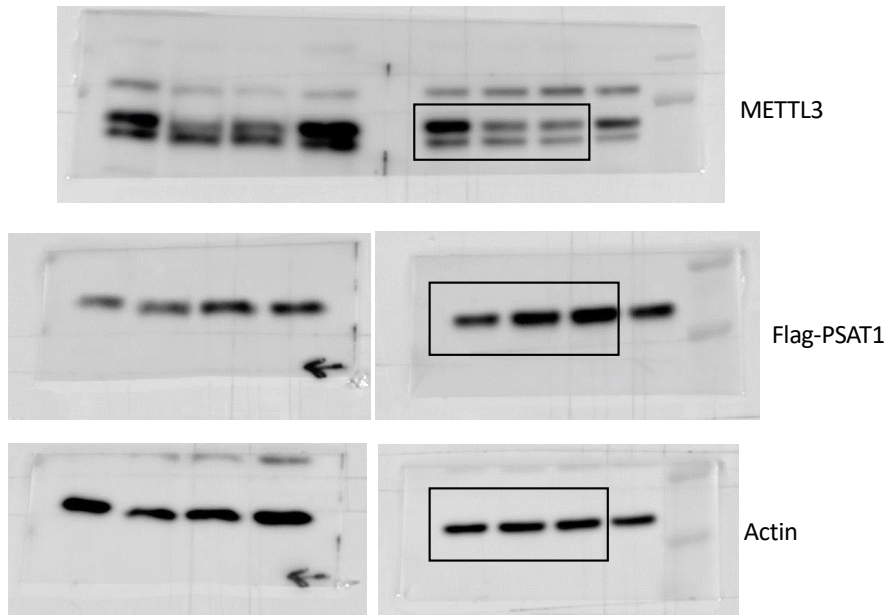

Full unedited gel for Figure S5E

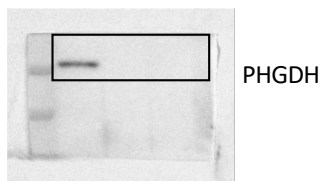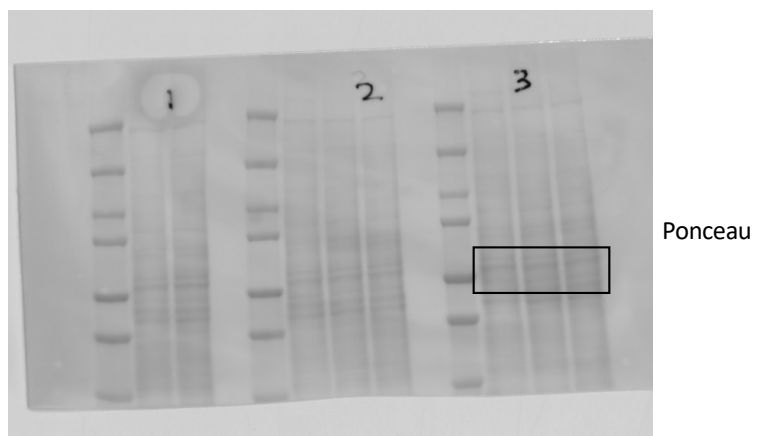

Full unedited gel for Figure S5G

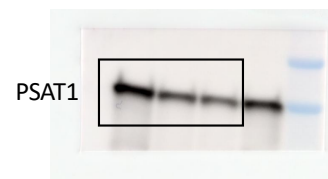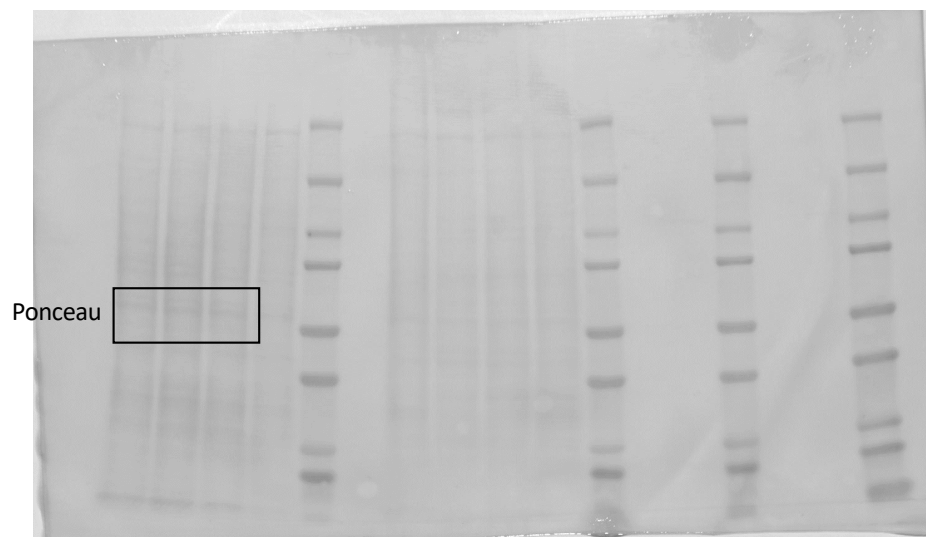

Supplement: jci-134-171294-s016.pdf [file jci-134-171294-s016.pdf]
