# Supplementary material for: l-2-Hydroxyglutarate remodeling of the epigenome and epitranscriptome creates a metabolic vulnerability in kidney cancer models
Source: PubMed Central journal article supplement (PMC11213505; doi:10.1172/jci171294), 2024-05-14
Supplement: jci-134-171294-s015.pdf [file jci-134-171294-s015.pdf]

S1

FDR ≤ 0.05      FDR ≥ 0.05

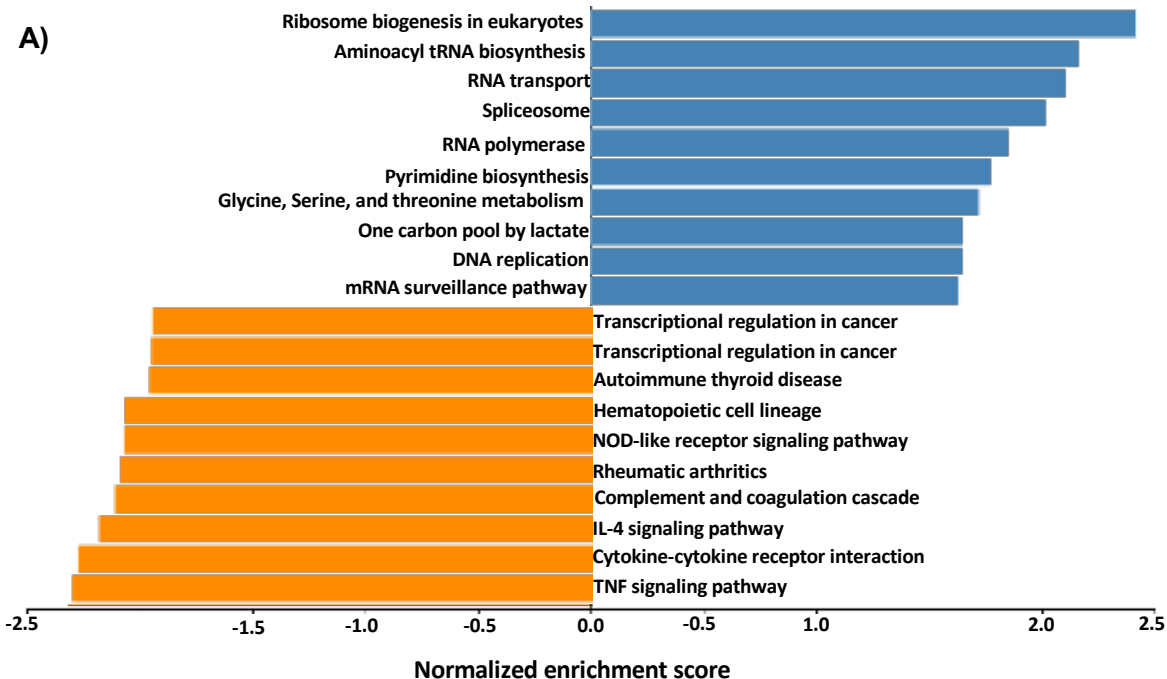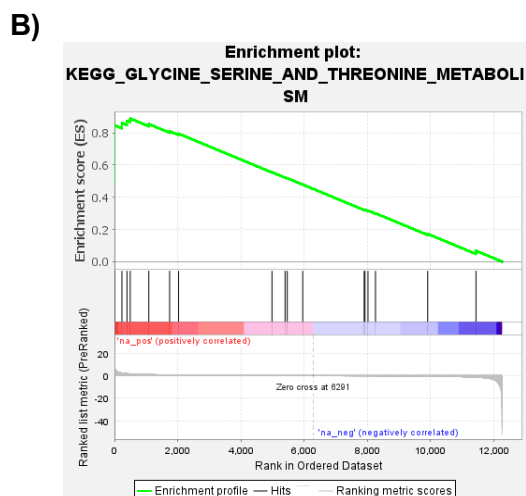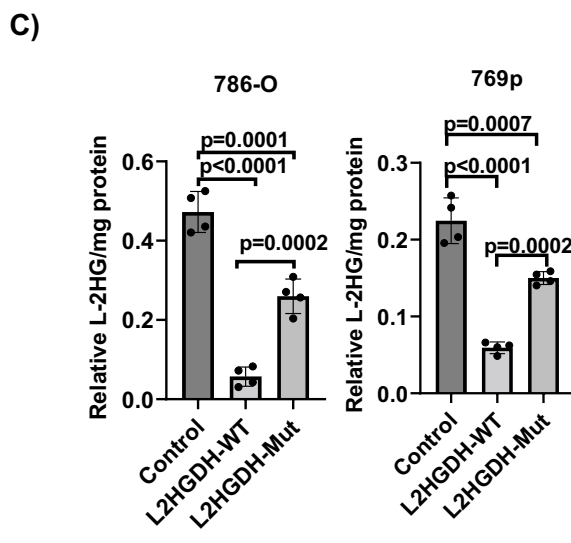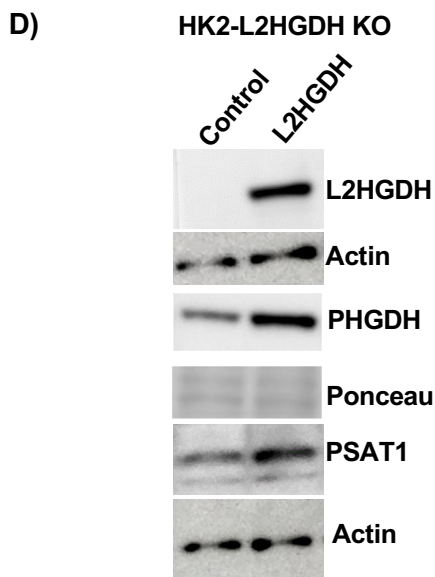

A) Gene ontology enrichment analysis of genes with increased (blue) or decreased (orange) expression upon L2HGDH restoration in RXF-393 cells. B) Enrichment plot for glycine/serine and threonine metabolism in RXF-393 cells restored with L2HGDH. The normalized enrichment score (NES) and FDR for the plot are 2.337 and 0.0, respectively. C) MS-analysis of L-2HG metabolite in 786-O and 769p cells harboring the indicated constructs (X-axis). Data represented as mean  $\pm$  SD from n=4 biological replicates. Data were analyzed by one-way ANOVA followed by post hoc Tukey's honestly significant difference test. ANOVA p-value for both the cell lines is  $<0.0001$  (F=100.4 for 786-O and F=81.15 for 769p). Post hoc analysis p-values are demonstrated in the figures. D) Immunoblot analysis of L2HGDH KO HK2 cells re-expressing either the control vector or L2HGDH construct.

**S2**

A)

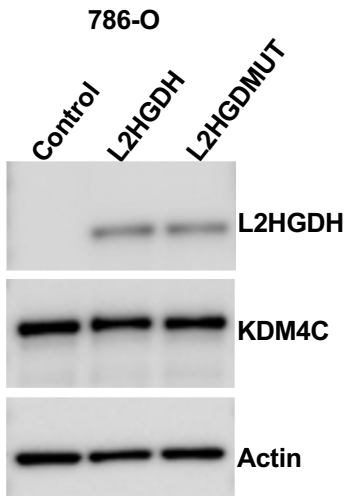

B)

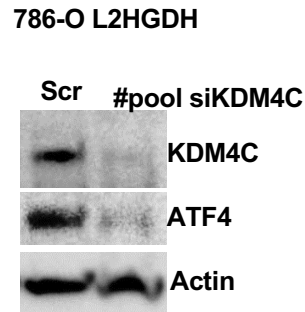

C)

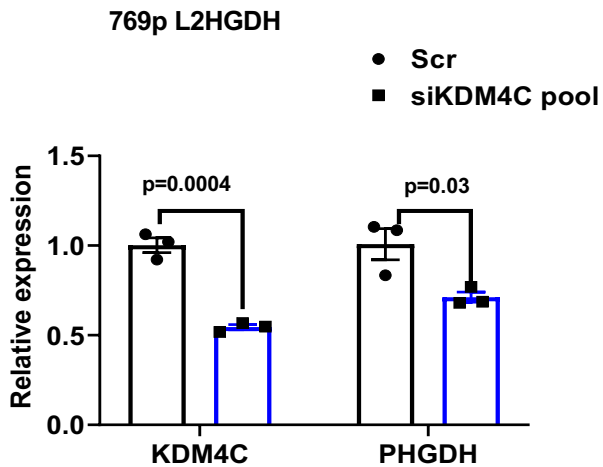

A) Immunoblot analysis of 786-O cells stably expressing either control vector or L2HGDH wild type (WT) or L2HGDH mutant (MUT). Actin was used as the loading control.

B) Immunoblot analysis of 786-O L2HGDH cells treated with either scrambled siRNA (Scr) or siRNA pool targeting KDM4C mRNA for 55 hrs. Actin was used as a loading control.

C) qPCR analysis of *KDM4C* and *PHGDH* mRNA expressions (normalized to *RPLPO*) from 769p L2HGDH cells treated with either scrambled siRNA (Scr) or siRNA pool targeting KDM4C for 55 hrs.

# S3

A)

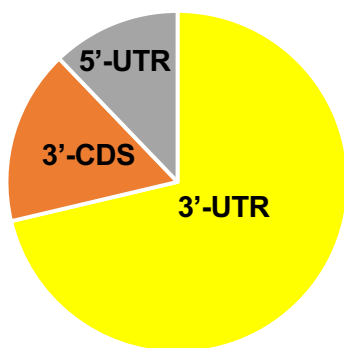

B)

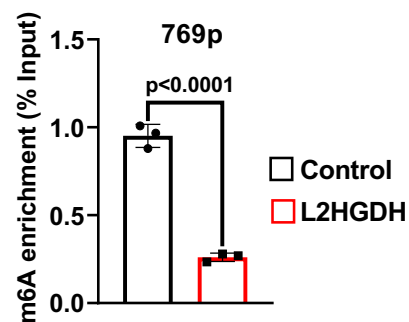

A) The distribution of mRNA m6A peaks in high L-2HG RCC cells.

B) m6A-IP qRT-PCR was used to assess m6A enrichment in the PSAT1 3'UTR from 769p cells stably transduced with the indicated vectors. PSAT1-1F/1R primer pair was used. Data are represented as mean  $\pm$  SD from n=3 biological replicates.

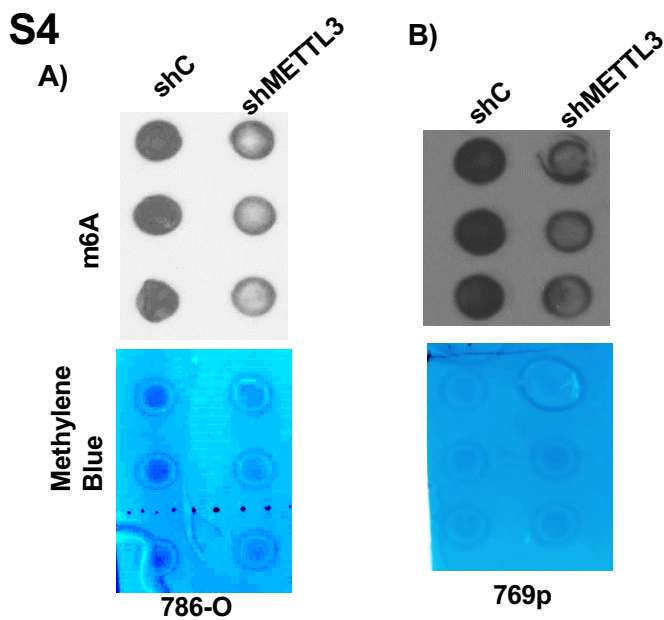

**C)** PSAT1

>chr9:78328990-78329497

PSAT1

GGCATCCGGGCCTCTCTGTATAATGCTGTCACAATTGAAGACGTTTCAGAAGCTGGCCGCCTTCATGAAAAAATTTTTGGAG  
 ATGCATCAGCTATGAACACATCCTAACCCAGGATATACTCTGTTCTTGAACAACATACAAAGTTTAAAGTAACTTGGGGATGG  
 CTACAAAAAGTTAACACAGTATTTTTCTCAAATGAACATGTTTATTGCAGATTCTTCTTTTTTGAAGAACAACAGCAAAC  
 ATCCACAACCTGTAAAGCTGGTGGGACCTAATGTCACCTTAATTCTGACTTGAAGCATTTTAAGAAATCTTGTG  
 CTTTTCTAACAAATCCC GCGTATTTTGCCTTTGCTGCTACTTTTTCTAGTTAGATTTCAA ACTTGCCTGT **GGACT** TAATAATG  
 CAAGTTGCGATTAATTATTTCTGGAGTCATGGGAACACACAGCACAGAGGGTAGGGGGGCCCTTAGGTGCTGAATCTAC  
 ACATCTGTGGGGTCTC

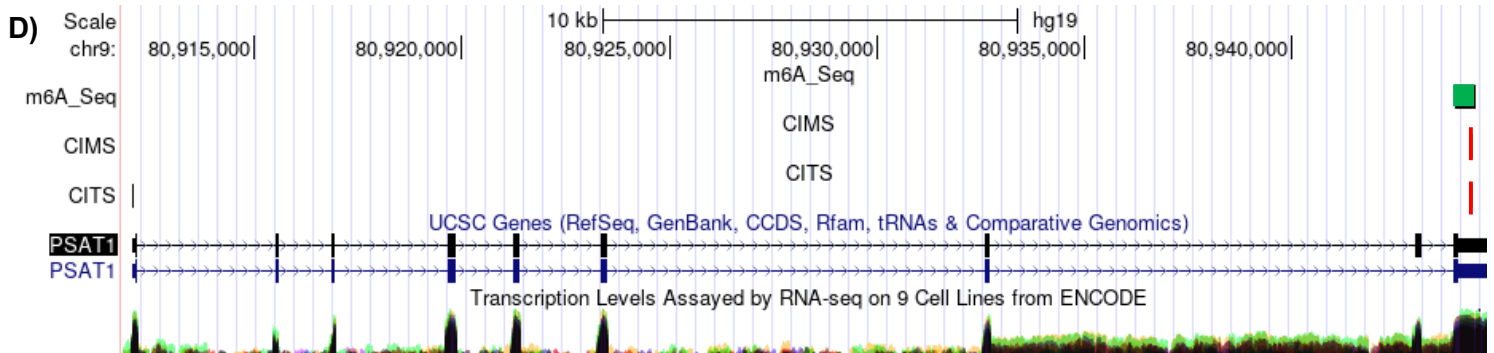

**E)** 786-O PSAT1 WT

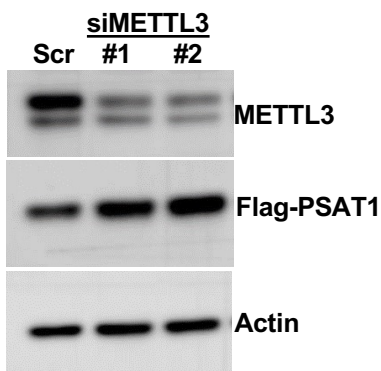

A, B) The level of m6A modification was determined by dot blot of 100 ng of mRNA isolated from 786-O (A) and 769p (B) cells (n=3 biological replicates) stably expressing either control shRNA (shC) or shMETTL3. Methylene blue blot serves as the loading control.

C) DRACH motif (GGACT) is highlighted in the PSAT1-3'UTR region.

D) PSAT1 track on hg19 genome assembly. m6A-modified sites (red lines) from two mi-CLIP data sets (CITS & CIMS) reported by Linder *et al.*, (2015) in HEK 293T cells. m6A-enriched region (green bar) present in the 3'-UTR of PSAT1 in high L-2HG RCC cells.

E) 786-O cells were stably transduced with FLAG-tagged PSAT1 (WT) construct. Cells were transiently transfected (52 hrs) with control siRNA (Scr) or siRNAs targeting METTL3 (#1, #2) followed by immunoblot analysis. Actin was used as the loading control.

S5

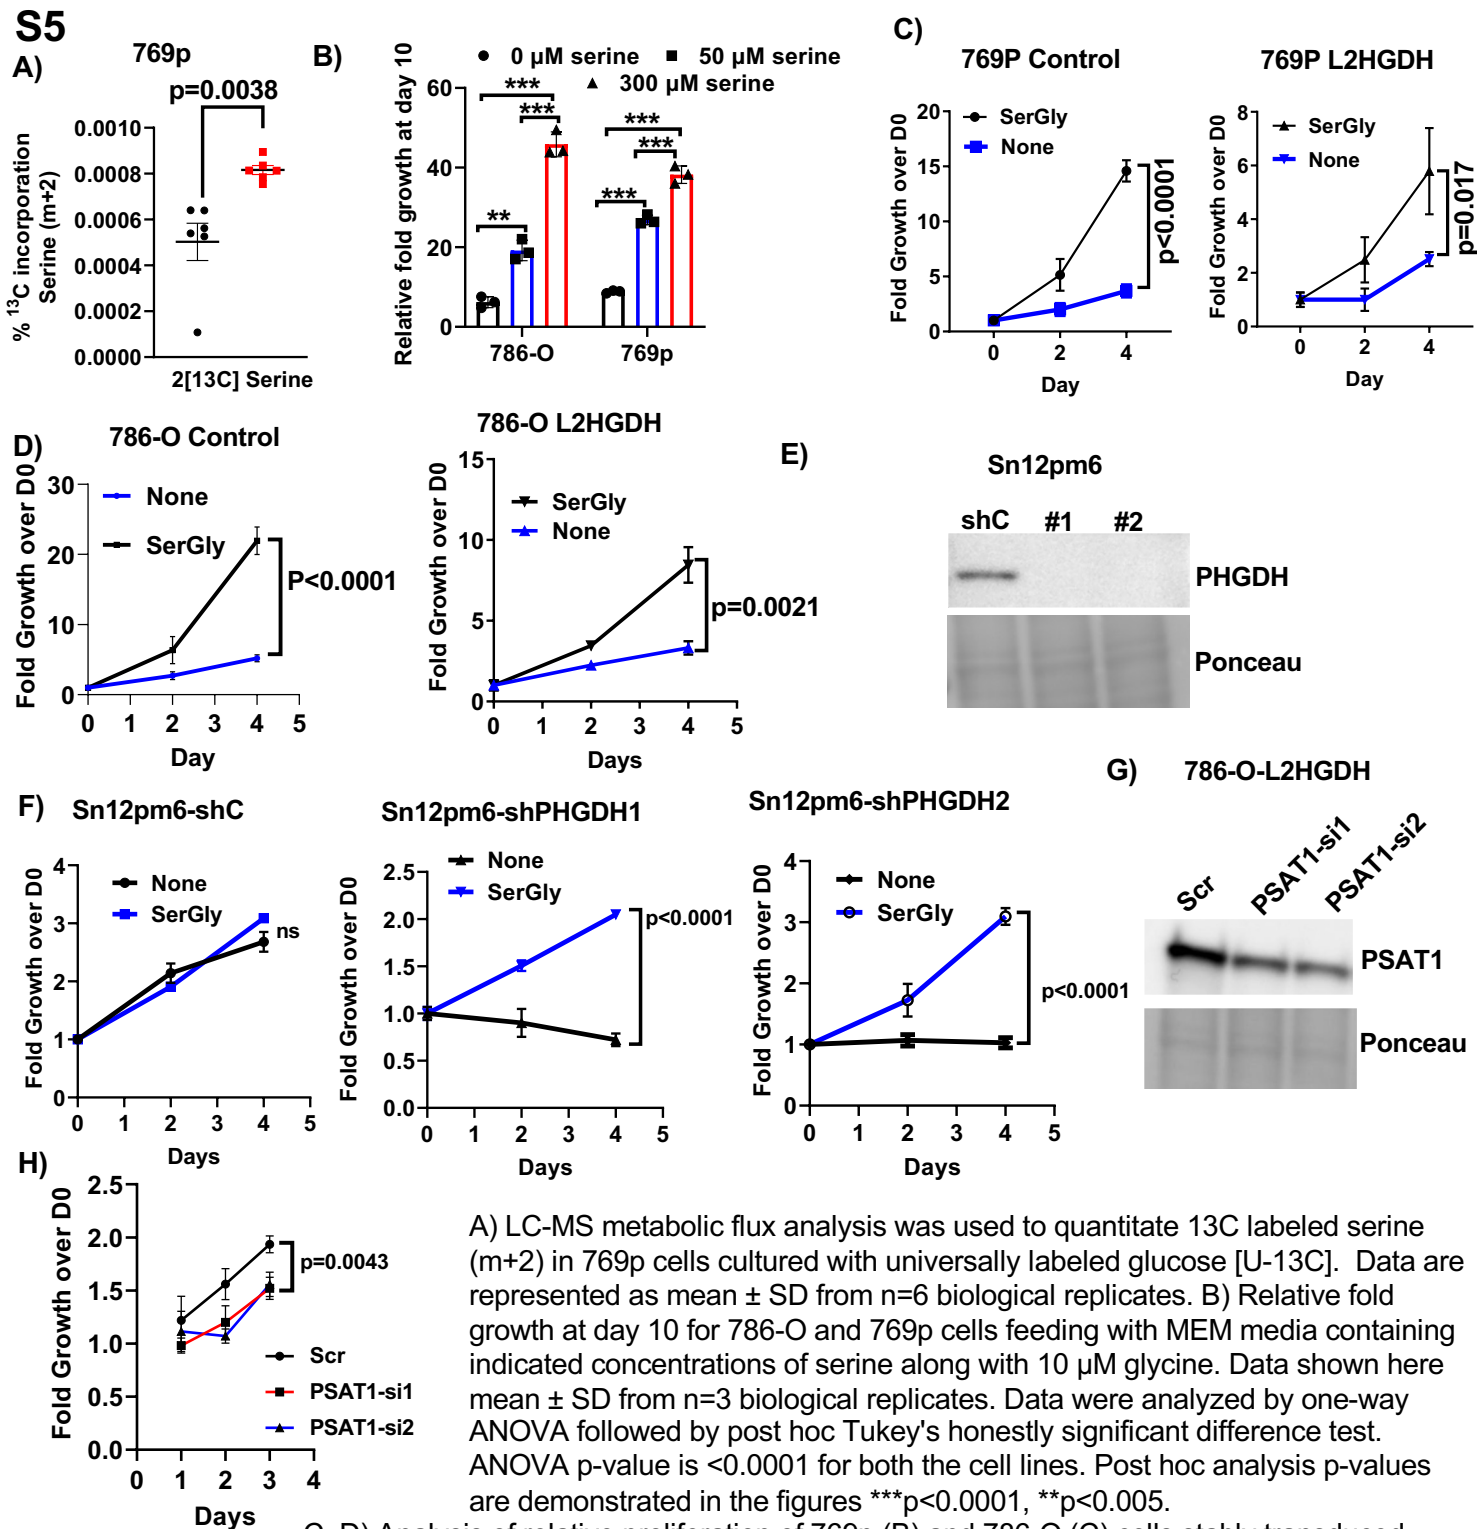

A) LC-MS metabolic flux analysis was used to quantitate <sup>13</sup>C labeled serine (m+2) in 769p cells cultured with universally labeled glucose [U-<sup>13</sup>C]. Data are represented as mean ± SD from n=6 biological replicates. B) Relative fold growth at day 10 for 786-O and 769p cells feeding with MEM media containing indicated concentrations of serine along with 10 μM glycine. Data shown here mean ± SD from n=3 biological replicates. Data were analyzed by one-way ANOVA followed by post hoc Tukey's honestly significant difference test. ANOVA p-value is <0.0001 for both the cell lines. Post hoc analysis p-values are demonstrated in the figures \*\*\*p<0.0001, \*\*p<0.005.

C, D) Analysis of relative proliferation of 769p (B) and 786-O (C) cells stably transduced with the indicated vector (left panel- control; right panel- L2HGDH) in media with or without Ser/Gly. Each data point is presented as mean ± SD from n=3 biological replicates.

\*p<0.05, ns-not significant.

E) Immunoblot of Sn12pm6 cells stably expressing either control shRNA (shC) or two shRNAs (#1, #2) targeting *PHGDH* mRNA. Actin was used as the loading control.

F) Analysis of relative proliferation of Sn12pm6 cells expressing the indicated vector (left panel control shRNA [shC]; middle and right panels- shRNAs targeting *PHGDH*) in media with or without Ser/Gly. Each data point is presented as mean ± SD from n=3 biological replicates. Repeated measures analysis was conducted, and the p-values reflect Tukey's post-hoc comparisons.

G, H) Immunoblot (G) of 786-O L2HGDH cells treated with scrambles (scr) or two siRNA constructs targeting *PSAT1* mRNA and analyzing their proliferation (H) in limited serine conditions. Data shown here mean ± SD from n=3 biological replicates and ANOVA p-value is mentioned in the figure with an F value of 15.45.

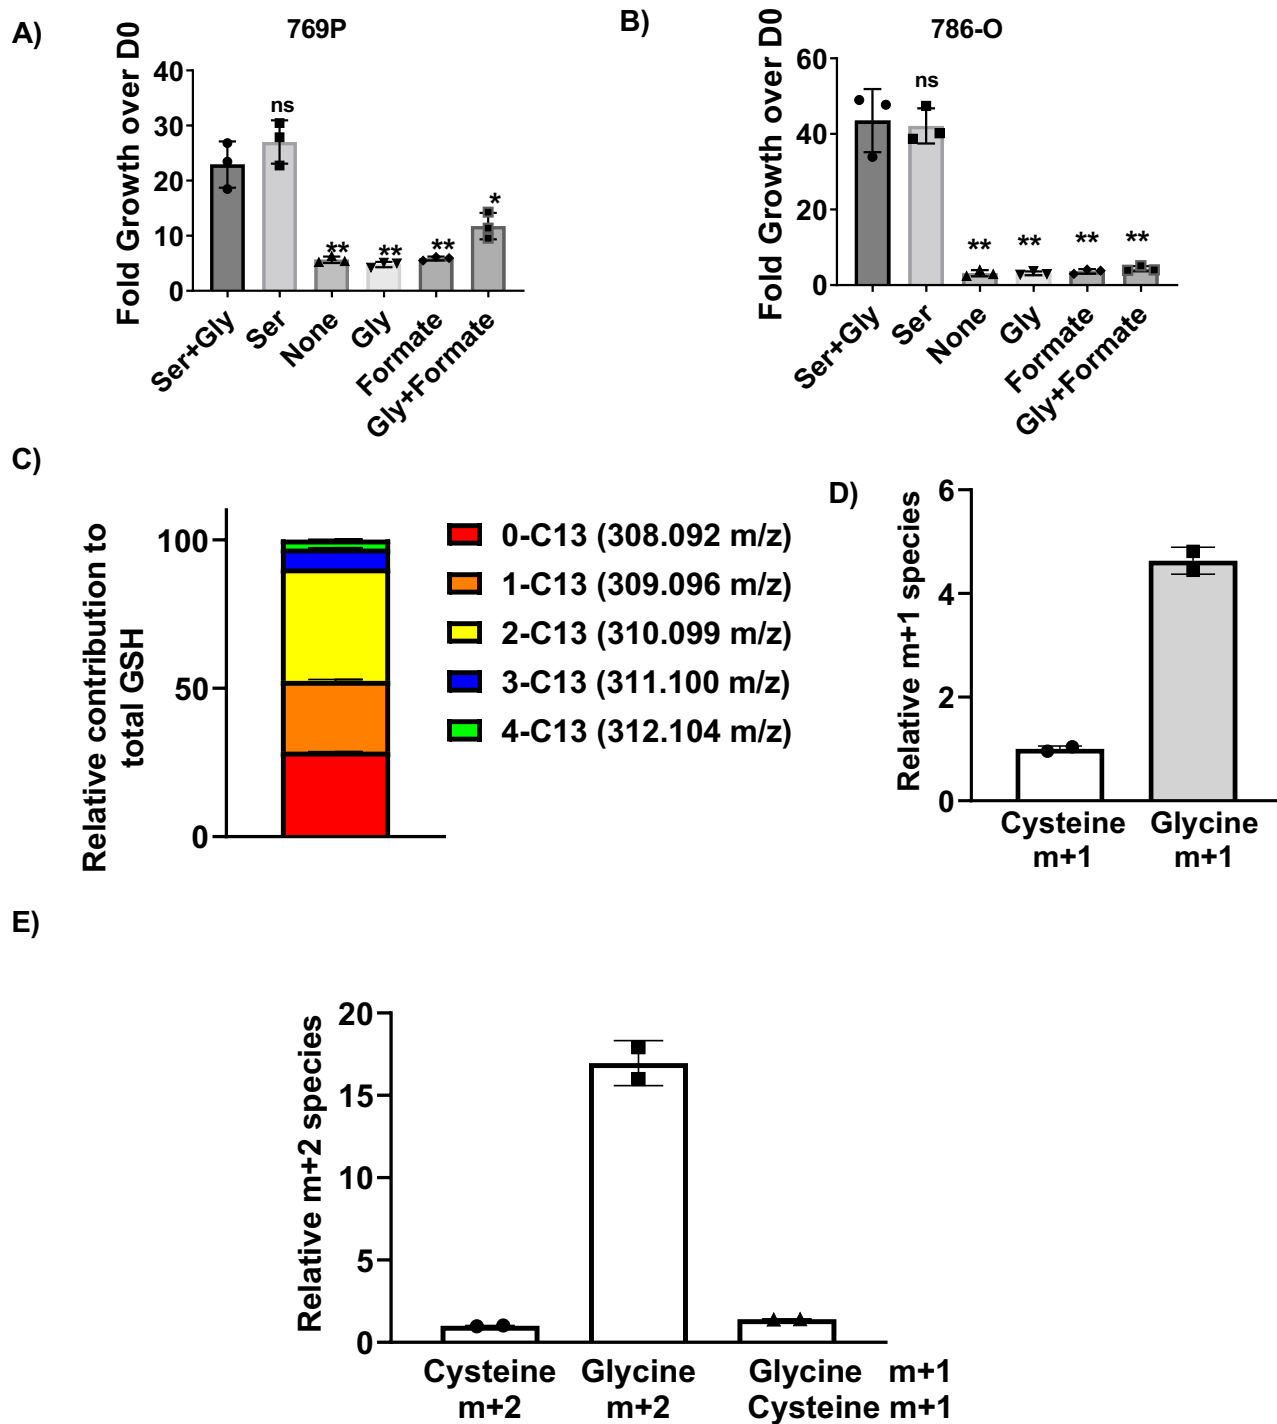

A, B) Analysis of relative proliferation of 769p (A) and 786-O cells (B) grown in RPMI media with the indicated supplements. None denotes cells cultured without serine/glycine. Data presented are mean  $\pm$  SD from  $n=3$  biological replicates. \*\* $p < 0.005$ , \* $p < 0.05$ , ns-not significant. (C) MS/MS Analysis of C13 labeled-GSH species from 769p cells fed with 300  $\mu$ M  $^{13}C_3$  labeled serine for 24 hrs after being maintained in serine-deprived RPMI media containing 133  $\mu$ M glycine and 10% dialyzed FBS. D, E) Relative levels of (m+1) (D) and (m+2) (E) massed cysteine and glycine species in 1-C13 and 2-C13 glutathione pools, respectively. Data presented are mean  $\pm$  SD from  $n=2$  biological replicates.

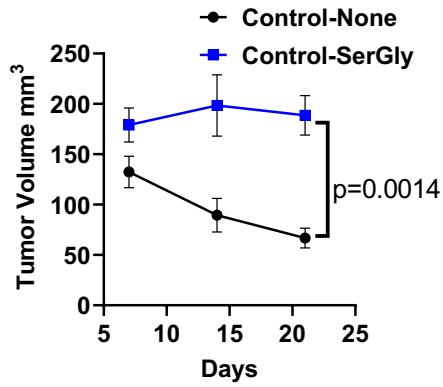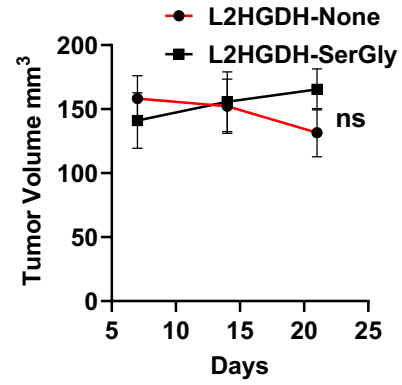

OS-RC-2 (+/- L2HGDH) xenograft growth with or without (none) serine and glycine diet over the course of three weeks. After the average tumor size had reached 100 mm<sup>3</sup>, mice were randomly distributed into two groups (n=8, each group). Data points are shown here after the diet switch. Data presented as mean  $\pm$  SEM. Repeated measures analysis was conducted, and the p-values reflect Tukey's post-hoc comparisons.
