# Supplementary material for: l-2-Hydroxyglutarate remodeling of the epigenome and epitranscriptome creates a metabolic vulnerability in kidney cancer models
Source: PubMed Central journal article supplement (PMC11213505; doi:10.1172/jci171294), 2024-05-14
Supplement: jci-134-171294-s021.pdf [file jci-134-171294-s021.pdf]

| <b>Taqman qPCR Probes</b> | <b>Company</b> | <b>#Catalog</b> |
|---------------------------|----------------|-----------------|
| qPCR probes for PHGDH     | Fisher         | Hs00198333_m1   |
| qPCR probes for HPRT1     | Fisher         | Hs02800695_m1   |
| qPCR probes for KDM4C     | Fisher         | Hs00909577_m1   |
| qPCR probes for ASNS      | Fisher         | Hs04186194_m1   |
| qPCR probes for PSAT1     | Fisher         | Hs00795278_mH   |
| qPCR probes for SLC1A5    | Fisher         | Hs01056542_m1   |
| qPCR probes for SLC1A4    | Fisher         | Hs00983079_m1   |
| qPCR probes for SLC3A2    | Fisher         | Hs00374243_m1   |
| qPCR probes for SLC7A5    | Fisher         | Hs01001183_m1   |
| qPCR probes for SLC38A1   | Fisher         | Hs01562175_m1   |
| qPCR probes for SLC38A2   | Fisher         | Hs01089954_m1   |
| qPCR probes for RPLPO     | Fisher         | Hs99999902_m1   |
| qPCR probes for L2HGDH    | Fisher         | Hs00227575      |
| qPCR probes for ATF4      | Fisher         | Hs00909569_g1   |

| <b>List of siRNAs</b>      | <b>Company</b> | <b>#Catalog</b>   |
|----------------------------|----------------|-------------------|
| Scrabled siRNA (Scr)       | IDT            | 51-01-19-09       |
| siALKBH5 (#1)              | IDT            | hs.Ri.ALKBH5.13.1 |
| siALKBH5 (#2)              | IDT            | hs.Ri.ALKBH5.13.2 |
| siALKBH5 (#3)              | IDT            | hs.Ri.ALKBH5.13.3 |
| siFTO (#1)                 | IDT            | hs.Ri.FTO.13.1    |
| siFTO (#2)                 | IDT            | hs.Ri.FTO.13.2    |
| siKDM4C (#1)               | IDT            | hs.Ri.KDM4C.13.1  |
| siKDM4C (#2)               | IDT            | hs.Ri.KDM4C.13.2  |
| siMETTL3 (#1)              | IDT            | hs.Ri.METTL3.13.1 |
| siMETTL3 (#2)              | IDT            | hs.Ri.METTL3.13.3 |
| On target KDM4C siRNA pool | Dharmacon      | L-004293-01-0005  |

| <b>gRNAs</b>            | <b>Sequence</b>                   |
|-------------------------|-----------------------------------|
| gRNA-3F                 | 5'-CCCGCCCAAACAAGAATTTTCACCG-3'   |
| gRNA-3R                 | 5'-GCTTTCATTAGCATAAGAGCTGCCTCC-3' |
| Control_gRNA_F (no PAM) | 5'-CACCGGTATTACTGATATTGGT-3'      |
| Control_gRNA_R (no PAM) | 5'-AAACACCAATATCAGTAATAC-3'       |

| <b>Primers used in RNA immunoprecipitation-qPCR</b> | <b>Sequence</b>            |
|-----------------------------------------------------|----------------------------|
| PSAT1-3'UTR-F1                                      | 5'-CCGCGTATTTTGCCTTTGCT-3' |
| PSAT1-3'UTR-R1                                      | 5'-CCTACCCTCTGTGCTGTGTG-3' |

| <b>Primers used in the SELECT Assay</b> | <b>Sequence</b>                                                 |
|-----------------------------------------|-----------------------------------------------------------------|
| SELECT Primer Up                        | 5'-TAGCCAGTACCGTAGTGCGTGTTAATCGCA<br>ACTTGCATTATTAAG-3'         |
| SELECT Primer Down                      | 5'-Phos-<br>CCACAGGCAAGTTTCAAATCCAGAGGCTGAGTCGCTGCA<br>T-3'     |
| M6a-up (-6)                             | 5'-TAGCCAGTACCGTAGTGCGTGCAACTTGCA<br>TTATTAAGTCCACA-3'          |
| M6a-down (-6)                           | 5-Phos<br>GCAAGTTTCAAATCTAACTAGAAAACCAGAGGCTGAGTCG<br>CTGCAT-3' |
| SELECT qPCR-F                           | 5'-ATGCAGCGACTCAGCCTCTG-3'                                      |
| SELECT qPCR-R                           | 5'- TAGCCAGTACCGTAGTGCGTG-3'                                    |
